# Supplementary material for: Identification of a Novel Protein-Based Prognostic Model in Gastric Cancers
Source: MDPI journal article supplement (doi:10.3390/biomedicines11030983), 2023-03-22
Supplement: s1 [file s1]

**Supplementary Table S1.** The clinical information of the GC cohort

| Clinicopathological features   | Levels         | Number (%)   |
|--------------------------------|----------------|--------------|
| Age (years)                    |                | 65.25 ±10.89 |
| Gender, <i>n</i> (%)           | Female         | 130 (36.9%)  |
|                                | Male           | 222 (63.1%)  |
| Pathological diagnosis         | Adenocarcinoma | 352 (100%)   |
| T stage, <i>n</i> (%)          | T1             | 12 (3.4%)    |
|                                | T2             | 69 (19.6%)   |
|                                | T3             | 169 (48%)    |
|                                | T4             | 102 (29%)    |
| N stage, <i>n</i> (%)          | N0             | 104 (29.6%)  |
|                                | N1             | 94 (26.7%)   |
|                                | N2             | 74 (21%)     |
|                                | N3             | 80 (22.7%)   |
| M stage, <i>n</i> (%)          | M0             | 325 (92.3%)  |
|                                | M1             | 27 (7.7%)    |
| Pathologic stage, <i>n</i> (%) | Stage I        | 39 (11.1%)   |
|                                | Stage II       | 106 (30.1%)  |
|                                | Stage III      | 167 (47.4%)  |
|                                | Stage IV       | 40 (11.4%)   |
| Tumor grade, <i>n</i> (%)      | G1             | 7 (2%)       |
|                                | G2             | 119 (33.8%)  |
|                                | G3             | 226 (64.2%)  |
